# Supplementary material for: Benchmarking study of deep generative models for inverse polymer design
Source: Royal Society of Chemistry journal article supplement (doi:10.1039/d4dd00395k), 2025-01-01
Supplement: d4dd00395k1.pdf [file d4dd00395k1.pdf]

## SUPPLEMENTARY INFORMATION

### Benchmarking Study of Deep Generative Models for Inverse Polymer Design

Tianle Yue,<sup>1</sup> Lei Tao,<sup>2</sup> Vikas Varshney,<sup>3</sup> Ying Li<sup>1\*</sup>

<sup>1</sup>Department of Mechanical Engineering, University of Wisconsin-Madison, Madison, WI 53706, United States

<sup>2</sup>Department of Mechanical Engineering, University of Connecticut, Storrs, CT 06269, United States

<sup>3</sup>Materials and Manufacturing Directorate, Air Force Research Laboratory, Wright-Patterson Air Force Base, OH 45433, United States

\*Corresponding author: [yli2562@wisc.edu](mailto:yli2562@wisc.edu)

Table S1. Count of each atom type present in real polymer dataset based on PolyInfo.

| Atom | Count  |
|------|--------|
| C    | 325910 |
| O    | 50008  |
| N    | 20415  |
| F    | 9063   |
| S    | 3399   |
| Cl   | 754    |
| P    | 432    |
| Si   | 984    |
| Br   | 360    |
| Sn   | 13     |
| Na   | 66     |
| As   | 4      |
| Ca   | 2      |
| Pb   | 2      |
| Te   | 3      |
| Ge   | 12     |
| K    | 8      |
| B    | 12     |
| Se   | 29     |
| I    | 29     |
| Co   | 2      |
| Zn   | 2      |
| Cd   | 2      |
| Li   | 8      |

Table S2. Count of each atom type present in hypothetical polyimide dataset based on PubChem.

| Atom | Count |
|------|-------|
|------|-------|

|   |          |
|---|----------|
| C | 21198924 |
| N | 2681288  |
| F | 229489   |
| O | 5348624  |
| S | 206982   |

Table S3. Count of each atom type present in hypothetical polyimide dataset based on GDB-13.

| Atom | Count    |
|------|----------|
| C    | 29742733 |
| N    | 3013512  |
| F    | 284368   |
| O    | 6083206  |
| S    | 105153   |
| B    | 3233     |
| Cl   | 60317    |
| P    | 9347     |
| Si   | 52218    |
| I    | 12136    |
| Br   | 16823    |
| Ar   | 251      |
| Sn   | 280      |
| As   | 1408     |
| Se   | 258      |
| Al   | 544      |
| In   | 3        |
| Hg   | 3        |

Table S4. Source codes for studied generative models.

| Model       | GitHub repository                                                                                                                                                                                                 |
|-------------|-------------------------------------------------------------------------------------------------------------------------------------------------------------------------------------------------------------------|
| AAE         | <a href="https://github.com/molecularsets/amos/tree/dd7ed6ab38e23afd3ef5371d67939a1760bd8599/amos/aae">https://github.com/molecularsets/amos/tree/dd7ed6ab38e23afd3ef5371d67939a1760bd8599/amos/aae</a>           |
| VAE         | <a href="https://github.com/molecularsets/amos/tree/dd7ed6ab38e23afd3ef5371d67939a1760bd8599/amos/vae">https://github.com/molecularsets/amos/tree/dd7ed6ab38e23afd3ef5371d67939a1760bd8599/amos/vae</a>           |
| CharRNN     | <a href="https://github.com/molecularsets/amos/tree/dd7ed6ab38e23afd3ef5371d67939a1760bd8599/amos/char_rnn">https://github.com/molecularsets/amos/tree/dd7ed6ab38e23afd3ef5371d67939a1760bd8599/amos/char_rnn</a> |
| ORGAN       | <a href="https://github.com/molecularsets/amos/tree/dd7ed6ab38e23afd3ef5371d67939a1760bd8599/amos/organ">https://github.com/molecularsets/amos/tree/dd7ed6ab38e23afd3ef5371d67939a1760bd8599/amos/organ</a>       |
| REINVENT    | <a href="https://github.com/undeadpixel/reinvent-randomized/tree/2eeca2d73e197943bc7f704022d30eee14c49cb6">https://github.com/undeadpixel/reinvent-randomized/tree/2eeca2d73e197943bc7f704022d30eee14c49cb6</a>   |
| GraphINVENT | <a href="https://github.com/MolecularAI/GraphINVENT/tree/6ef587ddb983f0c853dc8bc7b418f43cb69420c9">https://github.com/MolecularAI/GraphINVENT/tree/6ef587ddb983f0c853dc8bc7b418f43cb69420c9</a>                   |

Table S5. Source codes for studied generative models with reinforcement learning.

| Model       | GitHub repository                                                                                                                                                                                                                     |
|-------------|---------------------------------------------------------------------------------------------------------------------------------------------------------------------------------------------------------------------------------------|
| CharRNN     | <a href="https://github.com/aspuru-guzik-group/Tartarus/tree/b112b811616bee01fb3348e867b7406e4e6a62f4/models_jupyter">https://github.com/aspuru-guzik-group/Tartarus/tree/b112b811616bee01fb3348e867b7406e4e6a62f4/models_jupyter</a> |
| GraphINVENT | <a href="https://github.com/olsson-group/RL-GraphINVENT/tree/d4629a3c411c793e1ed1682592d5bf67937564a1">https://github.com/olsson-group/RL-GraphINVENT/tree/d4629a3c411c793e1ed1682592d5bf67937564a1</a>                               |
| REINVENT    | <a href="https://github.com/MolecularAI/Reinvent/tree/99b8f28c2a76196017eabf23118195ae546f5714">https://github.com/MolecularAI/Reinvent/tree/99b8f28c2a76196017eabf23118195ae546f5714</a>                                             |

Table S6. Scores for each metric of six generative models on the real homopolymer dataset from PolyInfo.

|           | Train | AAE   | CharRNN | GraphINVENT | ORGAN  | REINVENT | VAE   |
|-----------|-------|-------|---------|-------------|--------|----------|-------|
| $f_v$     | 1     | 0.273 | 0.866   | 0.738       | 0.005  | 0.601    | 0.498 |
| $f_{10k}$ | 1     | 0.867 | 0.696   | 0.581       | 0.879  | 0.833    | 0.820 |
| FCD       | 0.738 | 4.931 | 1.232   | 6.493       | 49.039 | 2.266    | 3.148 |
| SNN       | 0.629 | 0.538 | 0.621   | 0.467       | 0.153  | 0.609    | 0.596 |
| IntDiv    | 0.866 | 0.856 | 0.868   | 0.886       | 0.573  | 0.860    | 0.857 |

Table S7. Scores for each metric of six generative models on the hypothetical polyimide dataset synthesized based on GDB-13.

|           | Train | AAE   | CharRNN | GraphINVENT | ORGAN  | REINVENT | VAE   |
|-----------|-------|-------|---------|-------------|--------|----------|-------|
| $f_v$     | 1     | 0.703 | 0.675   | 0.191       | 0.331  | 0.962    | 0.658 |
| $f_{10k}$ | 1     | 1     | 0.999   | 0.907       | 0.707  | 0.999    | 0.999 |
| FCD       | 0.067 | 1.008 | 0.681   | 7.030       | 39.164 | 0.033    | 0.697 |
| SNN       | 0.598 | 0.554 | 0.544   | 0.330       | 0.357  | 0.574    | 0.548 |
| IntDiv    | 0.843 | 0.852 | 0.855   | 0.880       | 0.508  | 0.855    | 0.855 |

Table S8. Scores for each metric of six generative models on the hypothetical polyimide dataset synthesized based on PubChem.

|           | Train  | AAE   | CharRNN | GraphINVENT | ORGAN  | REINVENT | VAE   |
|-----------|--------|-------|---------|-------------|--------|----------|-------|
| $f_v$     | 1      | 0.925 | 0.959   | 0.144       | 0.002  | 0.977    | 0.901 |
| $f_{10k}$ | 1      | 0.999 | 1       | 0.857       | 0.167  | 1        | 1     |
| FCD       | 26.892 | 0.362 | 0.027   | 8.557       | 56.636 | 0.032    | 0.067 |
| SNN       | 0.291  | 0.597 | 0.596   | 0.319       | 0.423  | 0.603    | 0.598 |
| IntDiv    | 0.830  | 0.848 | 0.843   | 0.886       | 0.645  | 0.843    | 0.843 |

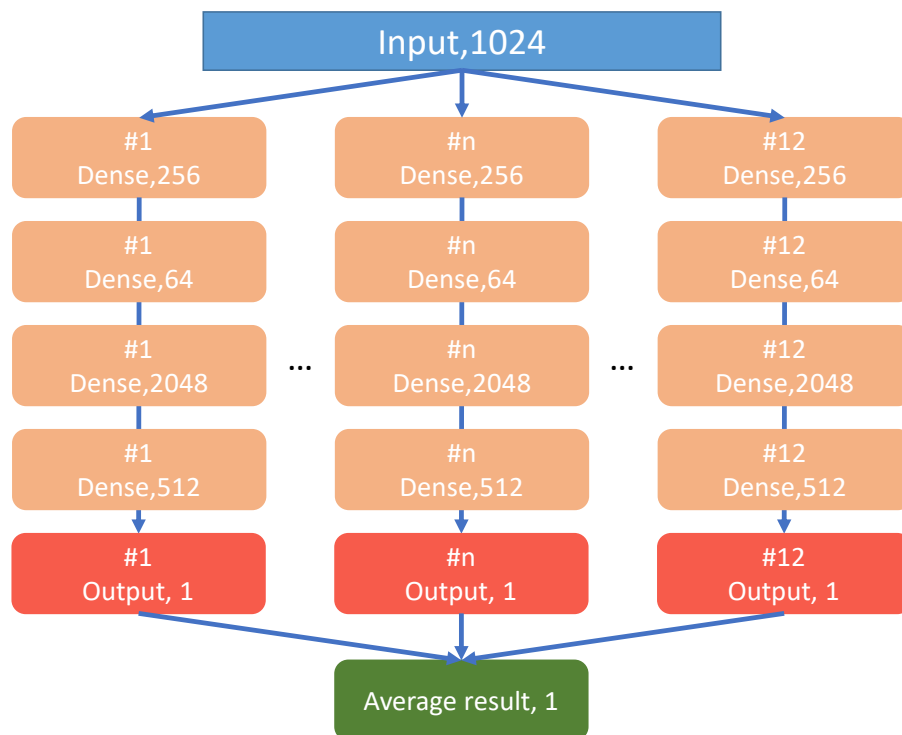

Figure S1. The architecture of the FNN model. The network's hyperparameters were optimized through grid search.

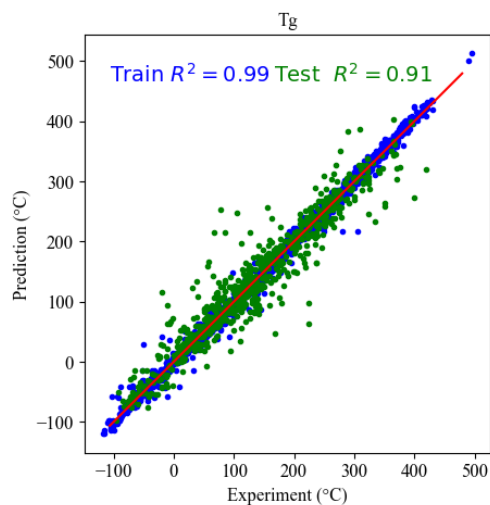

Figure S2. Parity plot of FNN models for  $T_g$ .

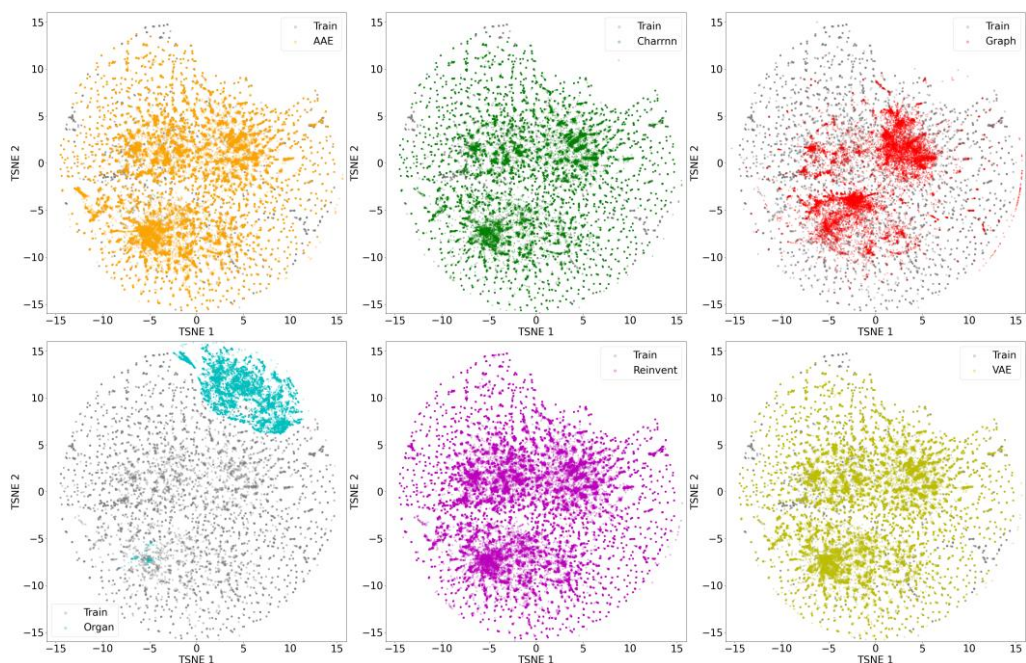

Figure S3. The individual t-SNE results for each model trained on the hypothetical polyimide dataset generated based on GDB-13.

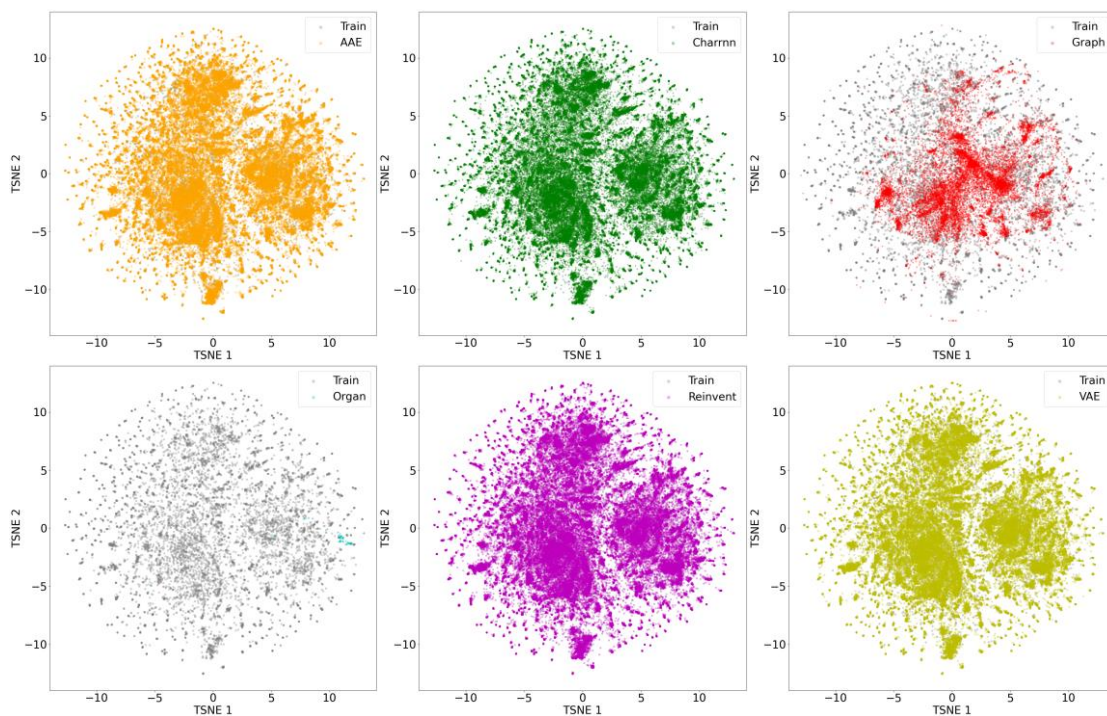

Figure S4. The individual t-SNE results for each model trained on the hypothetical polyimide dataset generated based on PubChem.

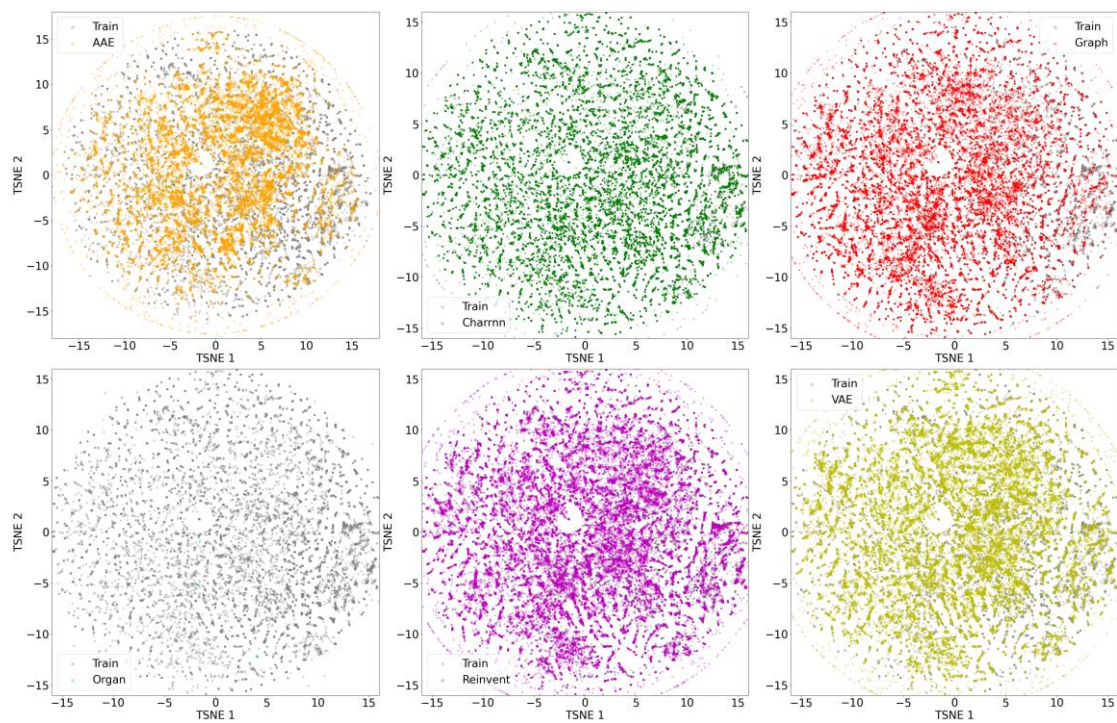

Figure S5. The individual t-SNE results for each model trained on the real polymers dataset collected from PolyInfo.

Table S9. Scores for each metric of five generative models on the real homopolymer dataset from PolyInfo with BigSMILES.

|           | Train | AAE   | CharRNN | ORGAN  | REINVENT | VAE   |
|-----------|-------|-------|---------|--------|----------|-------|
| $f_v$     | 1     | 0.366 | 0.768   | 0.582  | 0.082    | 0.476 |
| $f_{10k}$ | 1     | 0.895 | 0.682   | 0.515  | 0.752    | 0.875 |
| FCD       | 0.738 | 3.948 | 1.254   | 13.303 | 12.363   | 2.313 |
| SNN       | 0.629 | 0.518 | 0.603   | 0.563  | 0.431    | 0.574 |
| IntDiv    | 0.866 | 0.857 | 0.873   | 0.857  | 0.857    | 0.860 |

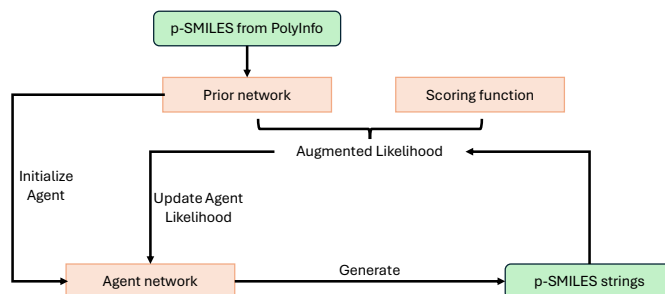

Figure S6. The Agent. Illustration of how the model is constructed. Starting with a Prior network trained on the PolyInfo dataset, the Agent is trained using the augmented likelihood of the generated p-SMILES strings. This training process gradually shifts the probability distribution from the original prior distribution toward one influenced by the desirability of the generated structures. The approach is inspired by Jaques et al.,<sup>1</sup> employing a policy-based reinforcement learning method that introduces a novel cost function to reduce reliance on handwritten rules and mitigate the issue of generating overly simplistic structures.<sup>2</sup>

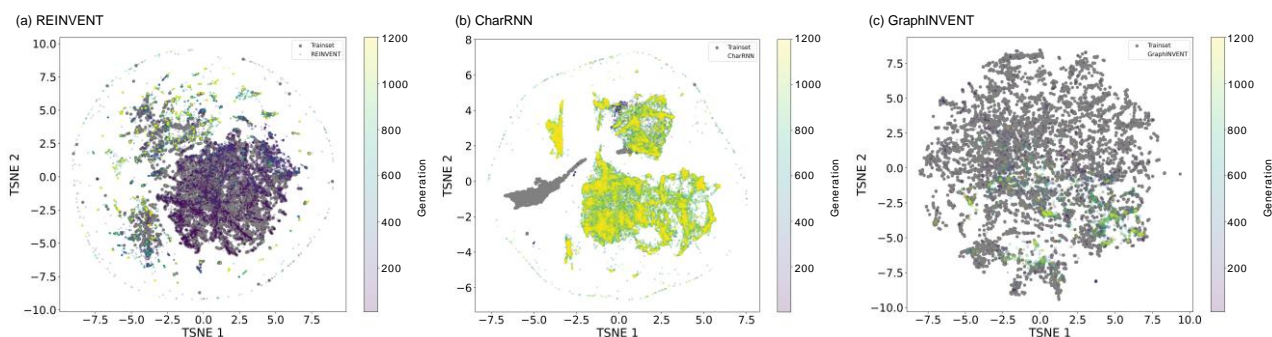

Figure S7. The chemical space covered by the training set is shown in grey, with a color gradient from deep purple to yellow representing the chemical space of polymer structures generated across training epochs from 0 to 1200 for (a) REINVENT, (b) CharRNN, and (c) GraphINVENT.

### Details of model parameters

**VAE** The encoder uses a GRU-based architecture with a hidden dimensionality of 256, a single layer, and a dropout rate of 0.5. The decoder also employs a GRU-based structure, with a hidden dimensionality of 512, three layers, and no dropout. The latent space is represented as a vector of dimensionality 128. Word embeddings are initialized with pre-trained vectors. The training process includes gradient clipping at a value of 50 and employs cosine annealing with restarts for learning rate scheduling. Learning rate is set at 0.0003. The KL divergence weight starts at 0 and linearly increases to 0.05 from a specified epoch. The total number of epochs is 100.

**AAE** The embedding layer has a size of 32, which is shared by the encoder and decoder. The encoder is configured with a hidden size of 512, a single LSTM layer, and no dropout. The decoder mirrors the encoder with a hidden size of 512, two LSTM layers, and no dropout. The latent space is represented by a vector of size 128, ensuring compact yet meaningful representations. For the discriminator, two fully connected layers with 640 and 256 neurons are used to differentiate between real and generated latent codes. The

training process includes an initial learning rate of 0.001, with periodic learning rate decay every 20 epochs and a decay factor of 0.5. The training runs for 120 epochs. The batch size is set to 512, and discriminator training steps are performed once per autoencoder training step.

**Char-RNN** The Char-RNN model is configured with 3 LSTM layers and a hidden size of 768. The embedding size matches the vocabulary size, and a dropout rate of 0.2 is applied between LSTM layers. Training parameters include 80 epochs a batch size of 64, an initial learning rate of 0.001, a step size of 10 epochs, and a decay factor of 0.5.

**ORGAN** The ORGAN model is configured with a default embedding size of 32 for both the generator and discriminator. The generator consists of 2 LSTM layers with a hidden size of 512 and no dropout, while the discriminator uses multiple convolutional layers with varying feature sizes and kernel sizes, also with no dropout. The training process includes 50 epochs of generator pretraining and 50 epochs of discriminator pretraining, followed by 1000 iterations of policy gradient training. The reward weight for the policy gradient is set to 0.7, with 16 rollouts per iteration. The learning rate is 0.0001, and gradient clipping is applied at a value of 5. The batch size is set to 64, with a maximum sequence length of 100, and one worker is used for data loading.

**REINVENT** The model is trained for 100 epochs with a batch size of 128. The learning rate starts at 1e-4 and can follow an exponential decay mode. The learning rate is updated every epoch by a factor of 0.8. Gradients are clipped at a norm of 1.0.

**GraphINVENT** The default model architecture is GGNN, which uses 4 layers in the message-passing network and a message size of 100. The number of message-passing steps is set to 3. Training parameters include a batch size of 1000, a learning rate of 0.0001. The training process runs for 100 epochs with sampling every 10 epochs. Additional configurations include the use of canonical RDKit atom ordering, a breadth-first decoding route, and TensorBoard for logging.

## REFERENCE

- (1) Jaques, N.; Gu, S.; Turner, R. E.; Eck, D. Tuning recurrent neural networks with reinforcement learning. **2017**.
- (2) Olivecrona, M.; Blaschke, T.; Engkvist, O.; Chen, H. Molecular de-novo design through deep reinforcement learning. *Journal of cheminformatics* **2017**, *9*, 1-14.
